# Supplementary material
Source: HighWire-hosted journal article supplement (https://bmjopen.bmj.com/content/12/1/e055777)
Supplement: inline-supplementary-material-2 [file inline-supplementary-material-2.pdf]

## Supplementary file 2: Database search strategies

### Search Strategy for Embase

1. (Psychosocial or psycho-social or psychodermat\* or social or cognit\* or emotion\* or well-being or psycholog\* or adjust\* disorder or depress\* or anxiety or anxious or coping or stress or mental health or guilt or embarrassment).m\_titl.
2. mental disease/
3. behavior/ or cognitive therapy/ or behavior disorder/
4. social participation/ or social support/ or social alienation/ or "social determinants of health"/ or social support assessment/ or social isolation/ or social psychiatry/ or social aspect/ or social network/ or social psychology/ or social isolation stress test/ or social behavior/ or Social Interaction Anxiety Scale/ or social norm/ or social life/ or social interaction/ or Social Support Index/ or social stigma/ or "social aspects and related phenomena"/ or social phobia/ or social acceptance/
5. cognitive behavioral stress management/ or Social Cognitive Theory/ or cognitive therapy/
6. psychosocial care/ or Psychosocial Adjustment to Illness Scale/ or psychosocial disorder/
7. anxiety/ or anxiety assessment/
8. emotion assessment/ or emotion/
9. wellbeing/ or psychological wellbeing assessment/
10. coping behavior/
11. guilt/
12. emotion/
13. depression/ or depression assessment/
14. psychological adjustment/ or adjustment disorder/ or adjustment/ or Psychosocial Adjustment to Illness Scale/
15. 1 or 2 or 3 or 4 or 5 or 6 or 7 or 8 or 9 or 10 or 11 or 12 or 13 or 14
16. (disease specific or dermatolog\* specific or disease burden or burden of disease or scale or needs assessment or psychosocial assessment or index or tool or interview or quality of life or validat\* or QoL or measure or impact or screen\* or wellbeing or well being or questionnaire or health related quality of life or health profile or assessment\* or inventory or intervention or evaluation or schedule or survey or audit or neuropsychological assessment or activities of daily living or dermatolog\* specific health instrument or psychosocial impact or psycho social impact).m\_titl.
17. disease burden/
18. exp questionnaire/ or exp "quality of life"/
19. clinical assessment tool/
20. psychological interview/ or interview/
21. exp "quality of life"/
22. health impact assessment/
23. exp needs assessment/
24. health survey/ or health care survey/
25. daily life activity/

26. 16 or 17 or 18 or 19 or 20 or 21 or 22 or 23 or 24 or 25
27. clinical assessment tool/
28. 26 or 27
29. (Caregiver\* or family or 'family caregiver' or 'family care giver\*' or parent or homecare\* or home care\* or adult or adults\* or grownup\* or grown up or families or relative or relation\* or mother\* or father\* or family nurs\* or primary care provider\* or informal caregiver\* or carer or 'greater patient concept' or homecare).m\_titl
30. caregiver burden/ or exp caregiver/ or caregiver support/ or Caregiver Strain Index/
31. parent/
32. adult/
33. home care/
34. family functioning/ or family coping/ or family life/ or family centered care/ or family stress/ or family health/ or exp family assessment/or exp family/
35. relative/
36. sibling/
37. grandparent/
38. 29 or 30 or 31 or 32 or 33 or 34 or 35 or 36 or 37
39. (Ichthyos\* or Skin\* or skin condition\* or skin disorder\* or scaliness or keratos\* or cornificat\* or rare skin dermatology\* or chronicdisease or chronic condition or long term condition or chronic illness or incurable or disability or life limiting or long term care or life threatening or palliative or assistive technology or continu\* of care or chronic car\* or continuing car\* or impact of chronic skin disese).m\_titl.
40. "ichthyosis bullosa of Siemens"/ or X linked ichthyosis/ or ichthyosis/ or lamellar ichthyosis/ or ichthyosis vulgaris/
41. exp skin/ or exp skin disease/
42. psychological rating scale/ or Psychosocial Adjustment to Illness Scale/
43. chronic disease/
44. rare disease/
45. diseases/co, dm [Complication, Disease Management]
46. palliative nursing/
47. eczema/
48. "Psoriasis Area and Severity Index"/ or psoriasis vulgaris/ or Psoriasis Severity Index/ or scalp psoriasis/ or exp psoriasis/
49. atopic dermatitis/ or exp dermatitis/
50. 39 or 40 or 41 or 42 or 43 or 44 or 45 or 46 or 47 or 48 or 49
51. (Child or children or infant\* or toddler\* or baby or babies or youngster\* or young pers\* or preschool\* or teenage\* or adolescen\* orprematu\*).m\_titl.

52. exp child/
53. infant/
54. preschool child/
55. toddler/
56. adolescent/
57. baby/
58. 51 or 52 or 53 or 54 or 55 or 56 or 57
59. 15 and 28 and 38 and 50 and 58
60. limit 59 to english language
61. limit 60 to yr="2000 -Current"

**Search Strategy for MEDLINE**

|    |                                                                                                                                                                                                                                                                                                                 |
|----|-----------------------------------------------------------------------------------------------------------------------------------------------------------------------------------------------------------------------------------------------------------------------------------------------------------------|
| 1  | mental disorders/ or anxiety disorders/ or dissociative disorders/ or mood disorders/ or neurocognitive disorders/ or neurotic disorders/ or personality disorders/ or sexual dysfunctions, psychological/ or sleep wake disorders/ or substance-related disorders/ or "trauma and stressor related disorders"/ |
| 2  | Psychiatry/nu, is [Nursing, Instrumentation]                                                                                                                                                                                                                                                                    |
| 3  | exp fatigue/ or exp behavioral symptoms/                                                                                                                                                                                                                                                                        |
| 4  | Stress, Psychological/co, di, ge, mo, nu, px [Complications, Diagnosis, Genetics, Mortality, Nursing, Psychology]                                                                                                                                                                                               |
| 5  | Depressive Disorder/nu, px [Nursing, Psychology]                                                                                                                                                                                                                                                                |
| 6  | Anxiety/ or Anxiety, Separation/ or Anxiety Disorders/ or Performance Anxiety/                                                                                                                                                                                                                                  |
| 7  | Personal Satisfaction/                                                                                                                                                                                                                                                                                          |
| 8  | Social Stigma/ or Social Support/ or Social Behavior/ or Social Isolation/ or "Social Determinants of Health"/ or Social Perception/ or Psychology, Social/ or Social Marginalization/                                                                                                                          |
| 9  | Depression/nu, px [Nursing, Psychology]                                                                                                                                                                                                                                                                         |
| 10 | Anxiety/ or Stress, Psychological/ or Adaptation, Psychological/ or Depression/                                                                                                                                                                                                                                 |
| 11 | Stress, Psychological/nu, px [Nursing, Psychology]                                                                                                                                                                                                                                                              |
| 12 | Guilt/px [Psychology]                                                                                                                                                                                                                                                                                           |
| 13 | Embarrassment/ or Emotions/                                                                                                                                                                                                                                                                                     |
| 14 | Behavior, Animal/is [Instrumentation]                                                                                                                                                                                                                                                                           |
| 15 | Cognition Disorders/ or Cognition/                                                                                                                                                                                                                                                                              |
| 16 | Social Stigma/ or Social Values/ or Social Participation/ or Social Behavior Disorders/ or Social Support/ or Social Behavior/ or Social Isolation/ or Social Perception/ or Psychology, Social/ or Phobia, Social/ or Social Skills/ or Social Networking/ or Social Marginalization/                          |
| 17 | 1 or 2 or 3 or 4 or 5 or 6 or 7 or 8 or 9 or 10 or 11 or 12 or 13 or 14 or 15 or 16                                                                                                                                                                                                                             |
| 18 | limit 17 to abstracts                                                                                                                                                                                                                                                                                           |
| 19 | (Psychosocial or psycho-social or psychodermat* or social or cognit* or emotion* or well-being or psychologic* or adjust* disorder or depress* or anxiety or anxious or coping or stress or mental health or guilt or embarrassment).m_titl.                                                                    |
| 20 | limit 19 to abstracts                                                                                                                                                                                                                                                                                           |

|    |                                                                                                                                                                                                                                                                                                                                                                                                                                                                                                                                                                                         |
|----|-----------------------------------------------------------------------------------------------------------------------------------------------------------------------------------------------------------------------------------------------------------------------------------------------------------------------------------------------------------------------------------------------------------------------------------------------------------------------------------------------------------------------------------------------------------------------------------------|
| 21 | 18 or 20                                                                                                                                                                                                                                                                                                                                                                                                                                                                                                                                                                                |
| 22 | (disease specific or dermatolog* specific or disease burden or burden of disease or scale or validat* or needs assessment or psychosocial assessment or index or tool or interview or quality of life or QoL or measure or impact or screen* or wellbeing or well being or questionnaire or health related quality of life or health profile or inventory or intervention or evaluation or schedule or survey or audit or neuropsychological assessment or activities of daily living or dermatolog* specific health instrument or psychosocial impact or psycho social impact).m_titl. |
| 23 | limit 22 to abstracts                                                                                                                                                                                                                                                                                                                                                                                                                                                                                                                                                                   |
| 24 | "Quality of Life"/px [Psychology]                                                                                                                                                                                                                                                                                                                                                                                                                                                                                                                                                       |
| 25 | "Surveys and Questionnaires"/                                                                                                                                                                                                                                                                                                                                                                                                                                                                                                                                                           |
| 26 | "Health Services Needs and Demand"/ or Needs Assessment/                                                                                                                                                                                                                                                                                                                                                                                                                                                                                                                                |
| 27 | "Outcome Assessment (Health Care)"/ or Personality Assessment/ or Self-Assessment/ or Nursing Assessment/ or "Process Assessment (Health Care)"/ or Symptom Assessment/ or "Outcome and Process Assessment (Health Care)"/                                                                                                                                                                                                                                                                                                                                                              |
| 28 | "Severity of Illness Index"/                                                                                                                                                                                                                                                                                                                                                                                                                                                                                                                                                            |
| 29 | "Tool Use Behavior"/                                                                                                                                                                                                                                                                                                                                                                                                                                                                                                                                                                    |
| 30 | "Quality of Life"/px [Psychology]                                                                                                                                                                                                                                                                                                                                                                                                                                                                                                                                                       |
| 31 | Interview, Psychological/ or Interview/                                                                                                                                                                                                                                                                                                                                                                                                                                                                                                                                                 |
| 32 | "Activities of Daily Living"/px [Psychology]                                                                                                                                                                                                                                                                                                                                                                                                                                                                                                                                            |
| 33 | 23 or 24 or 25 or 26 or 27 or 28 or 29 or 30 or 31 or 32                                                                                                                                                                                                                                                                                                                                                                                                                                                                                                                                |
| 34 | limit 33 to abstracts                                                                                                                                                                                                                                                                                                                                                                                                                                                                                                                                                                   |
| 35 | 23 or 34                                                                                                                                                                                                                                                                                                                                                                                                                                                                                                                                                                                |
| 36 | (Caregiver* or family or 'family caregiver' or 'family care giver**or parent or homecare* or home care* or adult or adults* or grownup* or grown up or families or relative or relation* or mother* or father* or family nurs* or primary care provider* or informal caregiver* or carer* or 'greater patient concept' or homecare).m_titl.                                                                                                                                                                                                                                             |
| 37 | limit 36 to abstracts                                                                                                                                                                                                                                                                                                                                                                                                                                                                                                                                                                   |
| 38 | Caregivers/px [Psychology]                                                                                                                                                                                                                                                                                                                                                                                                                                                                                                                                                              |
| 39 | Family/ or Family Health/ or Family Nursing/                                                                                                                                                                                                                                                                                                                                                                                                                                                                                                                                            |
| 40 | Parents/px [Psychology]                                                                                                                                                                                                                                                                                                                                                                                                                                                                                                                                                                 |
| 41 | Adult/px [Psychology]                                                                                                                                                                                                                                                                                                                                                                                                                                                                                                                                                                   |
| 42 | Humans/px [Psychology]                                                                                                                                                                                                                                                                                                                                                                                                                                                                                                                                                                  |

|    |                                                                                                                                                                                                                                                                                                                                                                                                                                        |
|----|----------------------------------------------------------------------------------------------------------------------------------------------------------------------------------------------------------------------------------------------------------------------------------------------------------------------------------------------------------------------------------------------------------------------------------------|
| 43 | Siblings/px [Psychology]                                                                                                                                                                                                                                                                                                                                                                                                               |
| 44 | Grandparents/px [Psychology]                                                                                                                                                                                                                                                                                                                                                                                                           |
| 45 | 38 or 39 or 40 or 41 or 42 or 43 or 44                                                                                                                                                                                                                                                                                                                                                                                                 |
| 46 | limit 45 to abstracts                                                                                                                                                                                                                                                                                                                                                                                                                  |
| 47 | 37 or 46                                                                                                                                                                                                                                                                                                                                                                                                                               |
| 48 | (Ichthyos* or Skin* or skin condition* or skin disorder* or scaliness or keratos* or cornificat* or rare skin dermatology* or chronic disease or chronic condition or long term condition or chronic illness or incurable or disability or life limiting or long term care or life threatening or palliative or assistive technology or continu* of care or chronic car* or continuing car* or impact of chronic skin disease).m_titl. |
| 49 | limit 48 to abstracts                                                                                                                                                                                                                                                                                                                                                                                                                  |
| 50 | Ichthyosis/ or Ichthyosis Vulgaris/ or Ichthyosis, X-Linked/ or Ichthyosis, Lamellar/ or "Ichthyosis Bullosa of Siemens"/                                                                                                                                                                                                                                                                                                              |
| 51 | exp Skin/ or exp Skin Diseases/                                                                                                                                                                                                                                                                                                                                                                                                        |
| 52 | exp Dermatology/                                                                                                                                                                                                                                                                                                                                                                                                                       |
| 53 | Psoriasis/ or Scalp Dermatoses/                                                                                                                                                                                                                                                                                                                                                                                                        |
| 54 | exp Dermatitis/ or exp Dermatitis, Atopic/                                                                                                                                                                                                                                                                                                                                                                                             |
| 55 | Eczema/                                                                                                                                                                                                                                                                                                                                                                                                                                |
| 56 | Chronic Disease/                                                                                                                                                                                                                                                                                                                                                                                                                       |
| 57 | Rare Diseases/                                                                                                                                                                                                                                                                                                                                                                                                                         |
| 58 | Palliative Care/ or Terminal Care/ or Chronic Disease/                                                                                                                                                                                                                                                                                                                                                                                 |
| 59 | 50 or 51 or 52 or 53 or 54 or 55 or 56 or 57 or 58                                                                                                                                                                                                                                                                                                                                                                                     |
| 60 | limit 59 to abstracts                                                                                                                                                                                                                                                                                                                                                                                                                  |
| 61 | 49 or 60                                                                                                                                                                                                                                                                                                                                                                                                                               |
| 62 | 21 and 35 and 47 and 61                                                                                                                                                                                                                                                                                                                                                                                                                |
| 63 | limit 62 to (english language and yr="2000 -Current")                                                                                                                                                                                                                                                                                                                                                                                  |
| 64 | exp Child/                                                                                                                                                                                                                                                                                                                                                                                                                             |
| 65 | exp Infant/                                                                                                                                                                                                                                                                                                                                                                                                                            |
| 66 | Child, Preschool/ or Infant/                                                                                                                                                                                                                                                                                                                                                                                                           |
| 67 | Adolescent/ or Young Adult/                                                                                                                                                                                                                                                                                                                                                                                                            |
| 68 | Infant, Premature, Diseases/ or Infant, Premature/ or Infant, Extremely Premature/ or Premature Birth/                                                                                                                                                                                                                                                                                                                                 |

|    |                                                                                                                                                                                                                                                                                                                                                                                                                                        |
|----|----------------------------------------------------------------------------------------------------------------------------------------------------------------------------------------------------------------------------------------------------------------------------------------------------------------------------------------------------------------------------------------------------------------------------------------|
| 69 | 64 or 65 or 66 or 67 or 68                                                                                                                                                                                                                                                                                                                                                                                                             |
| 70 | limit 69 to abstracts                                                                                                                                                                                                                                                                                                                                                                                                                  |
| 71 | (Child or children or infant* or toddler* or baby or babies or youngster* or young pers* or preschool* or teenage* or adolescen* or prematur*).mp. [mp=title, abstract, original title, name of substance word, subject heading word, floating sub-heading word, keyword heading word, organism supplementary concept word, protocol supplementary concept word, rare disease supplementary concept word, unique identifier, synonyms] |
| 72 | limit 71 to abstracts                                                                                                                                                                                                                                                                                                                                                                                                                  |
| 73 | 21 and 35 and 47 and 61 and 72                                                                                                                                                                                                                                                                                                                                                                                                         |
| 74 | 21 and 35 and 47 and 61                                                                                                                                                                                                                                                                                                                                                                                                                |
| 75 | limit 74 to (english language and yr="2000 -Current")                                                                                                                                                                                                                                                                                                                                                                                  |

### Search Strategy for PsychINFO

|                          |    |                                                                                                                                                                                                                                                                                                                                                                                                                                                                                                                                                                                         |
|--------------------------|----|-----------------------------------------------------------------------------------------------------------------------------------------------------------------------------------------------------------------------------------------------------------------------------------------------------------------------------------------------------------------------------------------------------------------------------------------------------------------------------------------------------------------------------------------------------------------------------------------|
| <input type="checkbox"/> | 1  | (Psychosocial or psycho-social or psychodermat* or social or cognit* or emotion* or well-being or psychologic* or adjust* disorder or depress* or anxiety or anxious or coping or stress or mental health or guilt or embarrassment).m_titl.                                                                                                                                                                                                                                                                                                                                            |
| <input type="checkbox"/> | 2  | limit 1 to abstracts                                                                                                                                                                                                                                                                                                                                                                                                                                                                                                                                                                    |
| <input type="checkbox"/> | 3  | Psychosocial Factors/ or Major Depression/                                                                                                                                                                                                                                                                                                                                                                                                                                                                                                                                              |
| <input type="checkbox"/> | 4  | exp Psychosocial Assessment/                                                                                                                                                                                                                                                                                                                                                                                                                                                                                                                                                            |
| <input type="checkbox"/> | 5  | Mental Health/ or Well Being/ or Life Satisfaction/ or Anxiety/                                                                                                                                                                                                                                                                                                                                                                                                                                                                                                                         |
| <input type="checkbox"/> | 6  | Psychological Stress/ or Stress/ or Chronic Stress/ or Social Stress/                                                                                                                                                                                                                                                                                                                                                                                                                                                                                                                   |
| <input type="checkbox"/> | 7  | Guilt/                                                                                                                                                                                                                                                                                                                                                                                                                                                                                                                                                                                  |
| <input type="checkbox"/> | 8  | exp Embarrassment/                                                                                                                                                                                                                                                                                                                                                                                                                                                                                                                                                                      |
| <input type="checkbox"/> | 9  | Social Identity/ or Social Isolation/ or Social Anxiety/ or Social Cognition/                                                                                                                                                                                                                                                                                                                                                                                                                                                                                                           |
| <input type="checkbox"/> | 10 | 3 or 4 or 5 or 6 or 7 or 8 or 9                                                                                                                                                                                                                                                                                                                                                                                                                                                                                                                                                         |
| <input type="checkbox"/> | 11 | limit 10 to abstracts                                                                                                                                                                                                                                                                                                                                                                                                                                                                                                                                                                   |
| <input type="checkbox"/> | 12 | 2 or 11                                                                                                                                                                                                                                                                                                                                                                                                                                                                                                                                                                                 |
| <input type="checkbox"/> | 13 | (disease specific or dermatolog* specific or disease burden or burden of disease or scale or needs assessment or psychosocial assessment or index or tool or interview or quality of life or validat* or QoL or measure or impact or screen* or wellbeing or well being or questionnaire or health related quality of life or health profile or inventory or intervention or evaluation or schedule or survey or audit or neuropsychological assessment or activities of daily living or dermatolog* specific health instrument or psychosocial impact or psycho social impact).m_titl. |
| <input type="checkbox"/> | 14 | limit 13 to abstracts                                                                                                                                                                                                                                                                                                                                                                                                                                                                                                                                                                   |



|                          |    |                                                                                                                                                                                                                                                                                                                                             |
|--------------------------|----|---------------------------------------------------------------------------------------------------------------------------------------------------------------------------------------------------------------------------------------------------------------------------------------------------------------------------------------------|
| <input type="checkbox"/> | 15 | Test Reliability/ or Test Validity/ or "Quality of Life"/ or Measurement/ or Psychometrics/ or Questionnaires/                                                                                                                                                                                                                              |
| <input type="checkbox"/> | 16 | exp Caregiver Burden/                                                                                                                                                                                                                                                                                                                       |
| <input type="checkbox"/> | 17 | Questionnaires/                                                                                                                                                                                                                                                                                                                             |
| <input type="checkbox"/> | 18 | exp Rating Scales/ or exp Screening Tests/                                                                                                                                                                                                                                                                                                  |
| <input type="checkbox"/> | 19 | Rating Scales/ or Screening Tests/                                                                                                                                                                                                                                                                                                          |
| <input type="checkbox"/> | 20 | exp Needs Assessment/                                                                                                                                                                                                                                                                                                                       |
| <input type="checkbox"/> | 21 | measurement/ or needs assessment/ or "quality of life measures"/ or interviews/                                                                                                                                                                                                                                                             |
| <input type="checkbox"/> | 22 | "Activities of Daily Living"/                                                                                                                                                                                                                                                                                                               |
| <input type="checkbox"/> | 23 | Surveys/                                                                                                                                                                                                                                                                                                                                    |
| <input type="checkbox"/> | 24 | 15 or 16 or 17 or 18 or 19 or 20 or 21 or 22 or 23                                                                                                                                                                                                                                                                                          |
| <input type="checkbox"/> | 25 | limit 24 to abstracts                                                                                                                                                                                                                                                                                                                       |
| <input type="checkbox"/> | 26 | 14 and 25                                                                                                                                                                                                                                                                                                                                   |
| <input type="checkbox"/> | 27 | (Caregiver* or family or 'family caregiver' or 'family care giver'*or parent or homecare* or home care* or adult or adults* or grownup* or grown up or families or relative or relation* or mother* or father* or family nurs* or primary care provider* or informal caregiver* or carer* or 'greater patient concept' or homecare).m_titl. |
| <input type="checkbox"/> | 28 | exp Caregivers/                                                                                                                                                                                                                                                                                                                             |
| <input type="checkbox"/> | 29 | Family/ or Extended Family/ or Family Members/                                                                                                                                                                                                                                                                                              |
| <input type="checkbox"/> | 30 | Home Care/ or Home Care Personnel/                                                                                                                                                                                                                                                                                                          |
| <input type="checkbox"/> | 31 | limit 27 to abstracts                                                                                                                                                                                                                                                                                                                       |
| <input type="checkbox"/> | 32 | 28 or 29 or 30                                                                                                                                                                                                                                                                                                                              |
| <input type="checkbox"/> | 33 | limit 32 to abstracts                                                                                                                                                                                                                                                                                                                       |
| <input type="checkbox"/> | 34 | 31 or 33                                                                                                                                                                                                                                                                                                                                    |
| <input type="checkbox"/> | 35 | (Ichthyos* or Skin* or skin condition* or skin disorder* or scaliness or keratos* or cornificat* or rare skin dermatology* or chronic disease or chronic condition or long term condition or chronic illness or incurable or disability or life limiting or long term care or life threatening or palliative or assistive technology or     |

|                          |    |                                                                                                |
|--------------------------|----|------------------------------------------------------------------------------------------------|
|                          |    | continu* of care or chronic car* or continuing car* or impact of chronic skin disease).m_titl. |
| <input type="checkbox"/> | 36 | limit 35 to abstracts                                                                          |
| <input type="checkbox"/> | 37 | exp Skin Disorders/                                                                            |
| <input type="checkbox"/> | 38 | Dermatitis/                                                                                    |
| <input type="checkbox"/> | 39 | Chronic Illness/ or Genetic Disorders/                                                         |
| <input type="checkbox"/> | 40 | Long Term Care/                                                                                |
| <input type="checkbox"/> | 41 | Palliative Care/                                                                               |
| <input type="checkbox"/> | 42 | 37 or 38 or 39 or 40 or 41                                                                     |
| <input type="checkbox"/> | 43 | 36 or 42                                                                                       |
| <input type="checkbox"/> | 44 | 12 and 26 and 34 and 43                                                                        |
| <input type="checkbox"/> | 45 | limit 44 to (english language and yr="2000 -Current")                                          |

**Search Strategy for CINAHL**

| #   | Query                                                                                                                                                         | Limiters/Expanders                                                                                                                      |
|-----|---------------------------------------------------------------------------------------------------------------------------------------------------------------|-----------------------------------------------------------------------------------------------------------------------------------------|
| S58 | S14 AND S33 AND S44 AND S57                                                                                                                                   | Limiters - Published Date: 20000101-2021105; English Language<br>Expanders - Apply equivalent subjects<br>Search modes - Boolean/Phrase |
| S57 | S52 OR S53 OR S54 OR S55 OR S56                                                                                                                               | Expanders - Apply equivalent subjects<br>Search modes - Boolean/Phrase                                                                  |
| S56 | (MH "Dermatology")                                                                                                                                            | Expanders - Apply equivalent subjects<br>Search modes - Boolean/Phrase                                                                  |
| S55 | (MH "Keratosis+")                                                                                                                                             | Expanders - Apply equivalent subjects<br>Search modes - Boolean/Phrase                                                                  |
| S54 | (MH "Skin+")                                                                                                                                                  | Expanders - Apply equivalent subjects<br>Search modes - Boolean/Phrase                                                                  |
| S53 | (MH "Ichthyosis+") OR (MH "Ichthyosiform Erythroderma, Congenital+")                                                                                          | Expanders - Apply equivalent subjects<br>Search modes - Boolean/Phrase                                                                  |
| S52 | ichthyos* or skin* or scaliness or keratos* or cornificat* or dermatolog*                                                                                     | Expanders - Apply equivalent subjects<br>Search modes - Boolean/Phrase                                                                  |
| S51 | S45 OR S46 OR S47 OR S48 OR S49 OR S50                                                                                                                        | Expanders - Apply equivalent subjects<br>Search modes - Boolean/Phrase                                                                  |
| S50 | (MH "Infant, Premature")                                                                                                                                      | Expanders - Apply equivalent subjects<br>Search modes - Boolean/Phrase                                                                  |
| S49 | (MH "Adolescence+")                                                                                                                                           | Expanders - Apply equivalent subjects<br>Search modes - Boolean/Phrase                                                                  |
| S48 | (MH "Child, Preschool")                                                                                                                                       | Expanders - Apply equivalent subjects<br>Search modes - Boolean/Phrase                                                                  |
| S47 | (MH "Infant+")                                                                                                                                                | Expanders - Apply equivalent subjects<br>Search modes - Boolean/Phrase                                                                  |
| S46 | (MH "Child+")                                                                                                                                                 | Expanders - Apply equivalent subjects<br>Search modes - Boolean/Phrase                                                                  |
| S45 | child* or infant* or toddler* or baby or babies or youngster* or "young pers*" or preschool* or teen* or adolescen* or prematur* or pediatric* or paediatric* | Expanders - Apply equivalent subjects<br>Search modes - Boolean/Phrase                                                                  |
| S44 | S34 OR S35 OR S36 OR S37 OR S38 OR S39 OR S40 OR S41 OR S42 OR S43                                                                                            | Expanders - Apply equivalent subjects<br>Search modes - Boolean/Phrase                                                                  |
| S43 | (MH "Primary Health Care")                                                                                                                                    | Expanders - Apply equivalent subjects<br>Search modes - Boolean/Phrase                                                                  |
| S42 | (MH "Family Nursing")                                                                                                                                         | Expanders - Apply equivalent subjects<br>Search modes - Boolean/Phrase                                                                  |
| S41 | (MH "Fathers+")                                                                                                                                               | Expanders - Apply equivalent subjects<br>Search modes - Boolean/Phrase                                                                  |

|     |                                                                                                                                                                                                                                                                                                                                               |                                                                        |
|-----|-----------------------------------------------------------------------------------------------------------------------------------------------------------------------------------------------------------------------------------------------------------------------------------------------------------------------------------------------|------------------------------------------------------------------------|
| S40 | (MH "Mothers+")                                                                                                                                                                                                                                                                                                                               | Expanders - Apply equivalent subjects<br>Search modes - Boolean/Phrase |
| S39 | (MH "Adult+")                                                                                                                                                                                                                                                                                                                                 | Expanders - Apply equivalent subjects<br>Search modes - Boolean/Phrase |
| S38 | (MH "Home Health Care+")                                                                                                                                                                                                                                                                                                                      | Expanders - Apply equivalent subjects<br>Search modes - Boolean/Phrase |
| S37 | (MH "Parents+")                                                                                                                                                                                                                                                                                                                               | Expanders - Apply equivalent subjects<br>Search modes - Boolean/Phrase |
| S36 | (MH "Family+") OR (MH "Extended Family+") OR (MH "Nuclear Family+")                                                                                                                                                                                                                                                                           | Expanders - Apply equivalent subjects<br>Search modes - Boolean/Phrase |
| S35 | (MH "Caregivers")                                                                                                                                                                                                                                                                                                                             | Expanders - Apply equivalent subjects<br>Search modes - Boolean/Phrase |
| S34 | caregiver* or family or "family caregiver" or "family care giver*" or parent or homecare* or "home care*" or adult or adults* or grownup* or "grown up" or families or relative* or relation* or mother* or father* or "family nurs*" or "primary care provider*" or "informal caregiver*" or carer* or "greater patient concept" or homecare | Expanders - Apply equivalent subjects<br>Search modes - Boolean/Phrase |
| S33 | S15 OR S32                                                                                                                                                                                                                                                                                                                                    | Expanders - Apply equivalent subjects<br>Search modes - Boolean/Phrase |
| S32 | S31 N5 S30                                                                                                                                                                                                                                                                                                                                    | Expanders - Apply equivalent subjects<br>Search modes - Boolean/Phrase |
| S31 | ("disease specific" or "dermatolog* specific" or "disease burden" or "burden of disease")                                                                                                                                                                                                                                                     | Expanders - Apply equivalent subjects<br>Search modes - Boolean/Phrase |
| S30 | S16 OR S17 OR S18 OR S19 OR S20 OR S21 OR S22 OR S23 OR S24 OR S25 OR S26 OR S27 OR S28 OR S29                                                                                                                                                                                                                                                | Expanders - Apply equivalent subjects<br>Search modes - Boolean/Phrase |
| S29 | (MH "Activities of Daily Living+")                                                                                                                                                                                                                                                                                                            | Expanders - Apply equivalent subjects<br>Search modes - Boolean/Phrase |
| S28 | (MH "Audit")                                                                                                                                                                                                                                                                                                                                  | Expanders - Apply equivalent subjects<br>Search modes - Boolean/Phrase |
| S27 | (MH "Surveys+")                                                                                                                                                                                                                                                                                                                               | Expanders - Apply equivalent subjects<br>Search modes - Boolean/Phrase |
| S26 | (MH "Evaluation+")                                                                                                                                                                                                                                                                                                                            | Expanders - Apply equivalent subjects<br>Search modes - Boolean/Phrase |
| S25 | (MH "Psychosocial Intervention")                                                                                                                                                                                                                                                                                                              | Expanders - Apply equivalent subjects<br>Search modes - Boolean/Phrase |
| S24 | (MH "Inventories")                                                                                                                                                                                                                                                                                                                            | Expanders - Apply equivalent subjects<br>Search modes - Boolean/Phrase |
| S23 | (MH "Questionnaires+")                                                                                                                                                                                                                                                                                                                        | Expanders - Apply equivalent subjects<br>Search modes - Boolean/Phrase |

|     |                                                                                                                                                                                                                                                                                                                                                                                                                                                                                                                                                                                                              |                                                                        |
|-----|--------------------------------------------------------------------------------------------------------------------------------------------------------------------------------------------------------------------------------------------------------------------------------------------------------------------------------------------------------------------------------------------------------------------------------------------------------------------------------------------------------------------------------------------------------------------------------------------------------------|------------------------------------------------------------------------|
| S22 | (MH "Psychological Well-Being")                                                                                                                                                                                                                                                                                                                                                                                                                                                                                                                                                                              | Expanders - Apply equivalent subjects<br>Search modes - Boolean/Phrase |
| S21 | (MH "Health Screening+")                                                                                                                                                                                                                                                                                                                                                                                                                                                                                                                                                                                     | Expanders - Apply equivalent subjects<br>Search modes - Boolean/Phrase |
| S20 | (MH "Interviews+")                                                                                                                                                                                                                                                                                                                                                                                                                                                                                                                                                                                           | Expanders - Apply equivalent subjects<br>Search modes - Boolean/Phrase |
| S19 | (MH "Clinical Assessment Tools+") OR<br>(MH "Research Instruments+")                                                                                                                                                                                                                                                                                                                                                                                                                                                                                                                                         | Expanders - Apply equivalent subjects<br>Search modes - Boolean/Phrase |
| S18 | (MH "Scales")                                                                                                                                                                                                                                                                                                                                                                                                                                                                                                                                                                                                | Expanders - Apply equivalent subjects<br>Search modes - Boolean/Phrase |
| S17 | (MH "Needs Assessment")                                                                                                                                                                                                                                                                                                                                                                                                                                                                                                                                                                                      | Expanders - Apply equivalent subjects<br>Search modes - Boolean/Phrase |
| S16 | (MH "Quality of Life+")                                                                                                                                                                                                                                                                                                                                                                                                                                                                                                                                                                                      | Expanders - Apply equivalent subjects<br>Search modes - Boolean/Phrase |
| S15 | ("disease specific" or "dermatolog*<br>specific" or "disease burden" or "burden<br>of disease") N5 (scale or "needs<br>assessment" or "psychosocial<br>assessment" or index or tool or interview<br>or "quality of life" or validat* or QoL or<br>measure or impact or screen* or<br>wellbeing or "well being" or well-being or<br>questionnaire or "health profile" or<br>inventory or intervention or evaluation or<br>schedule or survey or audit or<br>"neuropsychological assessment" or<br>"activit* of daily living" or "health<br>instrument" or "psychosocial impact" or<br>"psycho social impact") | Expanders - Apply equivalent subjects<br>Search modes - Boolean/Phrase |
| S14 | S1 OR S2 OR S3 OR S4 OR S5 OR S6<br>OR S7 OR S8 OR S9 OR S10 OR S11<br>OR S12 OR S13                                                                                                                                                                                                                                                                                                                                                                                                                                                                                                                         | Expanders - Apply equivalent subjects<br>Search modes - Boolean/Phrase |
| S13 | (MH "Embarrassment")                                                                                                                                                                                                                                                                                                                                                                                                                                                                                                                                                                                         | Expanders - Apply equivalent subjects<br>Search modes - Boolean/Phrase |
| S12 | (MH "Guilt+")                                                                                                                                                                                                                                                                                                                                                                                                                                                                                                                                                                                                | Expanders - Apply equivalent subjects<br>Search modes - Boolean/Phrase |
| S11 | (MH "Mental Health")                                                                                                                                                                                                                                                                                                                                                                                                                                                                                                                                                                                         | Expanders - Apply equivalent subjects<br>Search modes - Boolean/Phrase |
| S10 | (MH "Coping+")                                                                                                                                                                                                                                                                                                                                                                                                                                                                                                                                                                                               | Expanders - Apply equivalent subjects<br>Search modes - Boolean/Phrase |
| S9  | (MH "Anxiety+")                                                                                                                                                                                                                                                                                                                                                                                                                                                                                                                                                                                              | Expanders - Apply equivalent subjects<br>Search modes - Boolean/Phrase |
| S8  | (MH "Depression+")                                                                                                                                                                                                                                                                                                                                                                                                                                                                                                                                                                                           | Expanders - Apply equivalent subjects<br>Search modes - Boolean/Phrase |
| S7  | (MH "Adjustment Disorders+")                                                                                                                                                                                                                                                                                                                                                                                                                                                                                                                                                                                 | Expanders - Apply equivalent subjects<br>Search modes - Boolean/Phrase |

|    |                                                                                                                                                                                                                                                                    |                                                                        |
|----|--------------------------------------------------------------------------------------------------------------------------------------------------------------------------------------------------------------------------------------------------------------------|------------------------------------------------------------------------|
| S6 | (MH "Adjustment Disorders+")                                                                                                                                                                                                                                       | Expanders - Apply equivalent subjects<br>Search modes - Boolean/Phrase |
| S5 | (MH "Stress, Psychological+") OR (MH "Diagnosis, Psychosocial+")                                                                                                                                                                                                   | Expanders - Apply equivalent subjects<br>Search modes - Boolean/Phrase |
| S4 | (MH "Psychological Well-Being")                                                                                                                                                                                                                                    | Expanders - Apply equivalent subjects<br>Search modes - Boolean/Phrase |
| S3 | (MH "Emotions+")                                                                                                                                                                                                                                                   | Expanders - Apply equivalent subjects<br>Search modes - Boolean/Phrase |
| S2 | (MH "Social Cognition") OR (MH "Cognition+")                                                                                                                                                                                                                       | Expanders - Apply equivalent subjects<br>Search modes - Boolean/Phrase |
| S1 | psychosocial or psycho-social or psychodermat* or social or cognit* or emotion* or well-being or wellbeing or "well being" or psychologic* or "adjust disorder" or depress* or anxiety or anxious or coping or stress or "mental health" or guilt or embarrassment | Expanders - Apply equivalent subjects<br>Search modes - Boolean/Phrase |

#### **Search Strategy for Cochrane Central Register of Controlled Trials (CENTRAL)**

'Skin' AND 'caregiver' AND 'skin disease' AND 'dermatological tool' were searched using the advanced search function.

#### **Search Strategy for U Search**

'Caregiver' AND 'dermatology or skin disease' AND 'measurement tool or assessment tool' AND 'children or adolescents or youth or child or teenager' were searched using the advanced search function.

#### **Search Strategy for Web of Science**

Query preview was '[ALL=(dermatology assessment tools)) AND ALL=(caregivers )]
