# Supplementary material
Source: HighWire-hosted journal article supplement (https://bmjopen.bmj.com/content/12/1/e055777)
Supplement: inline-supplementary-material-5 [file inline-supplementary-material-5.pdf]

Supplementary file 5: Figure 1:PRISMA Flow Chart for initial search (Jan 2000-April 2020)

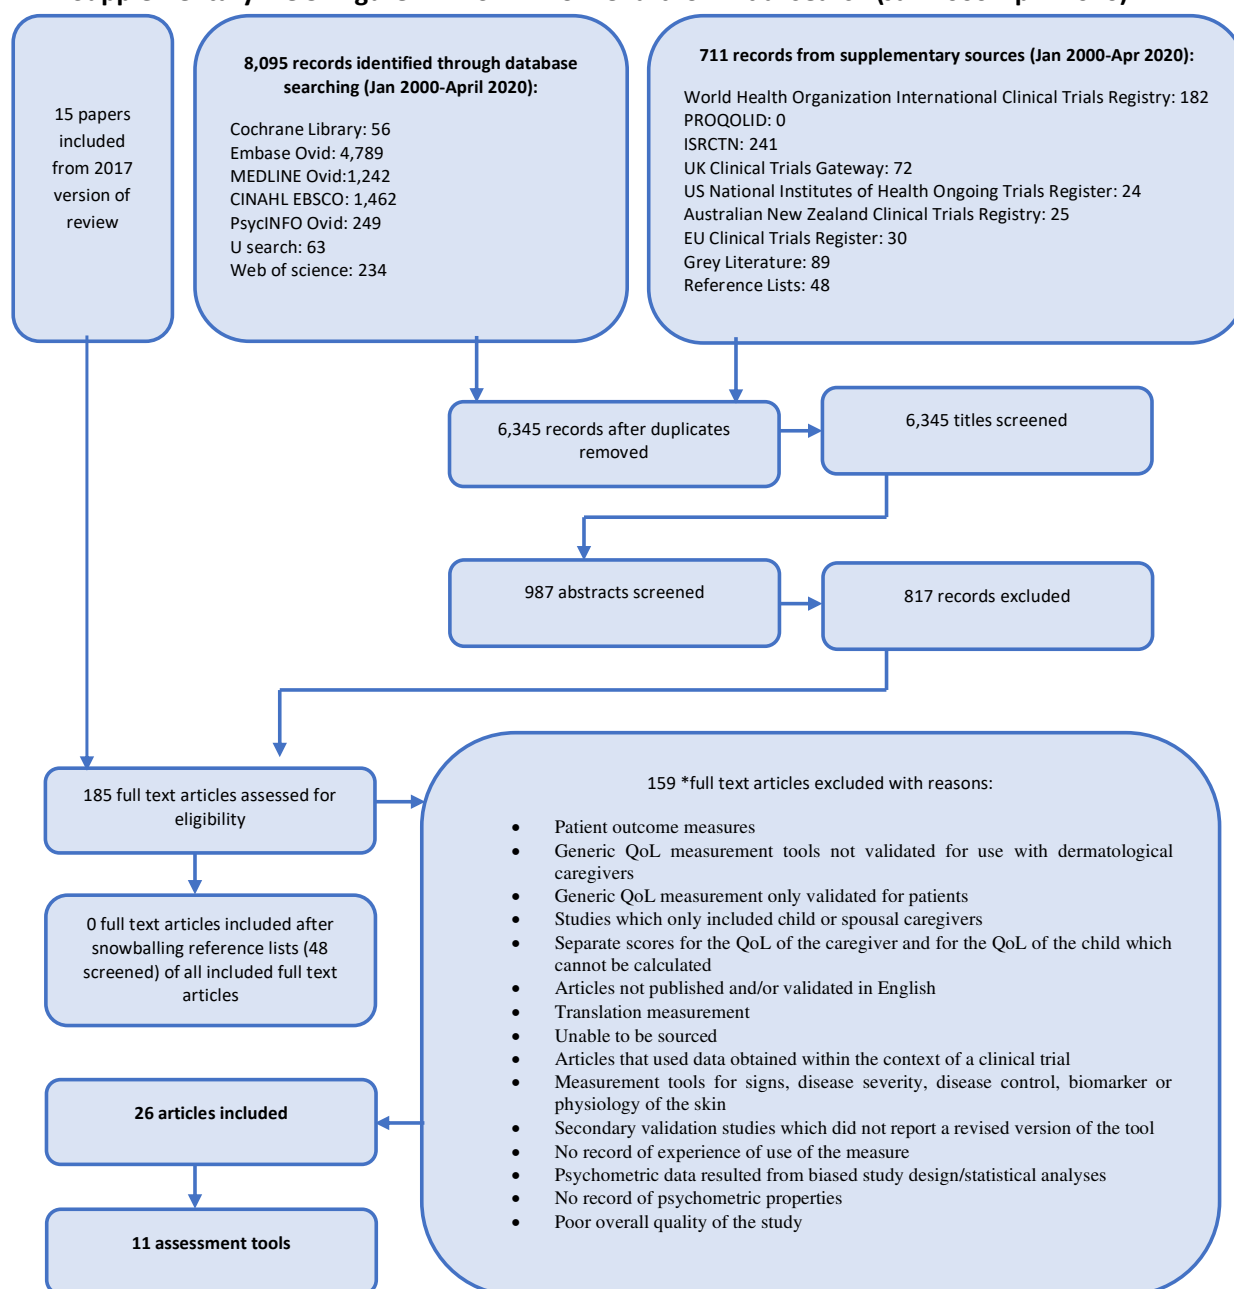**Figure 1 Legend:**

PRISMA, Preferred Reporting Items for Systematic Reviews and Meta-Analyses.; CINAHL, Cumulated Index to Nursing and Allied Health Literature; EBSCO, Elton B. Stephens Company; PsycINFO, Psychological Information Database; U Search, Ulster University Search; PROQOLID, Patient-Reported Outcome and Quality of Life Instruments Database; ISRCTN, International Standard Randomised Controlled Trials Number; UK, United Kingdom; US, United States; EU, European Union; QoL, Quality of Life.

### New studies included from updated search

During the updated search, a total of 173 records were identified. 161 records were identified from database searches and an additional 12 records were identified from supplementary searches. In total, 57 records were available after duplicates (n=114) were removed. 57 titles were screened. 5 abstracts were screened and 2 full text record were assessed for eligibility.<sup>1,2</sup>

One record<sup>1</sup> identified no new measurement tool, with the **Family Dermatology Life Quality Index (FDLQI)** already included in our initial search. The second record<sup>2</sup> was excluded for a reason as listed in the exclusion criteria in Figure 1 (psychometric data resulted from biased study design). This exclusion was also justified by quotations from the paper ('Validity was established in a limited range of subjects', 'the parents that responded to the survey were all mothers', 'The present study was a single-institution cross-sectional study in Japan targeting parents of infants and toddlers (first-time patients less than 7 years old)').

In summary, no new studies and no new assessment tools were identified in our updated review. Please see PRISMA flow diagram (fig.2) below.

### References

1. Zychowska M, Reich A, Maj J, Jankowska-Konsur A, Szepietowski J. Impact of Childhood Psoriasis on Caregivers' Quality of Life, Measured with Family Dermatology Life Quality Index. *J Eur Acad Dermatol Venereol* 2020; 100.
2. Sato H, Goto A, Murakami M, Kawabata Y. Development of a Pediatric Dermatology Screening tool based on Two Parent-Reported Skin Symptoms: Comparison of Parental Recognition and Physician Diagnosis of Skin Symptoms of Infants and Toddlers. *J Prim Care Community Health* 2020;11: 1-7.

**Figure 2: PRISMA Flow Diagram for updated search (01 Apr 2020 to 05 Oct 2021)**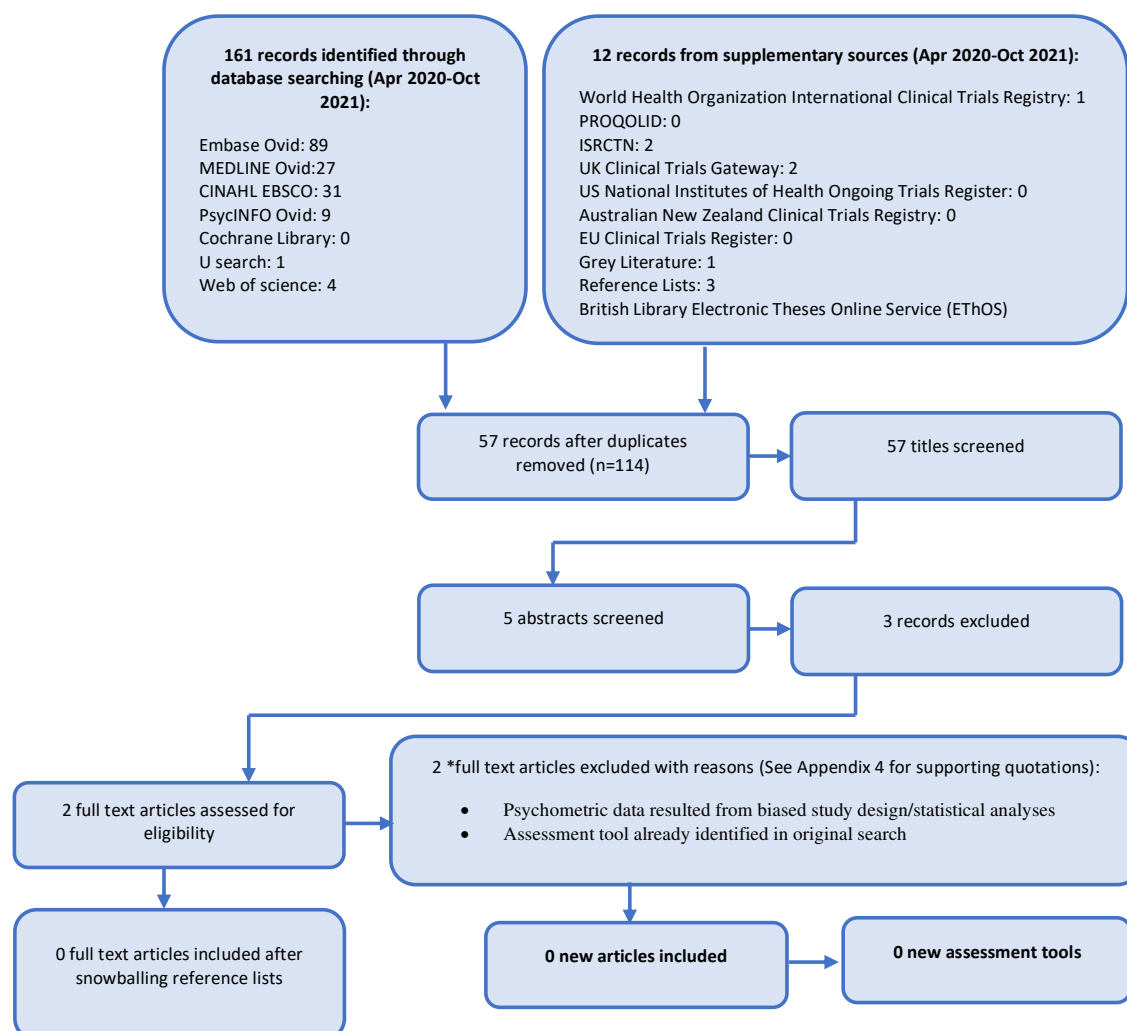**Figure 2 Legend:**

PRISMA, Preferred Reporting Items for Systematic Reviews and Meta-Analyses.; CINAHL, Cumulated Index to Nursing and Allied Health Literature; EBSCO, Elton B. Stephens Company; PsycINFO, Psychological Information Database; U Search, Ulster University Search; PROQOLID, Patient-Reported Outcome and Quality of Life Instruments Database; ISRCTN, International Standard Randomised Controlled Trials Number; UK, United Kingdom; US, United States; EU, European Union.
